# Supplementary material for: Australians’ views and experience of personal genomic testing: survey findings from the Genioz study
Source: PubMed Central journal article supplement (PMC6461785; doi:10.1038/s41431-018-0325-x), 2019-01-21

**Supplementary Figure 4:** Age of Genioz respondents (n=2 819) compared with Australian Bureau of Statistics 2011 census data

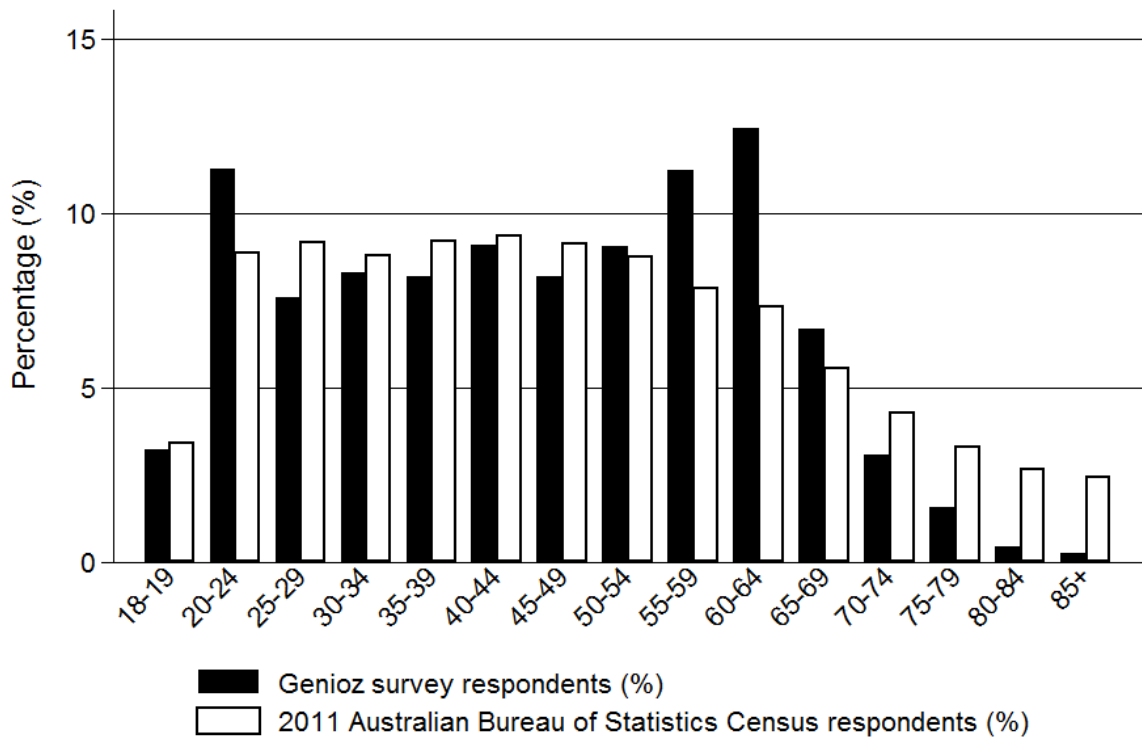

Supplement: 41431_2018_325_MOESM5_ESM.pdf [file 41431_2018_325_MOESM5_ESM.pdf]
