# Supplementary material for: Australians’ views and experience of personal genomic testing: survey findings from the Genioz study
Source: PubMed Central journal article supplement (PMC6461785; doi:10.1038/s41431-018-0325-x), 2019-01-21

**Supplementary Figure 5.** Boxplot of the average median score out of 15 for the knowledge questions for all respondents (n=2 633); including a breakdown of those who have had testing (n=571) and those without testing (n=2 062)

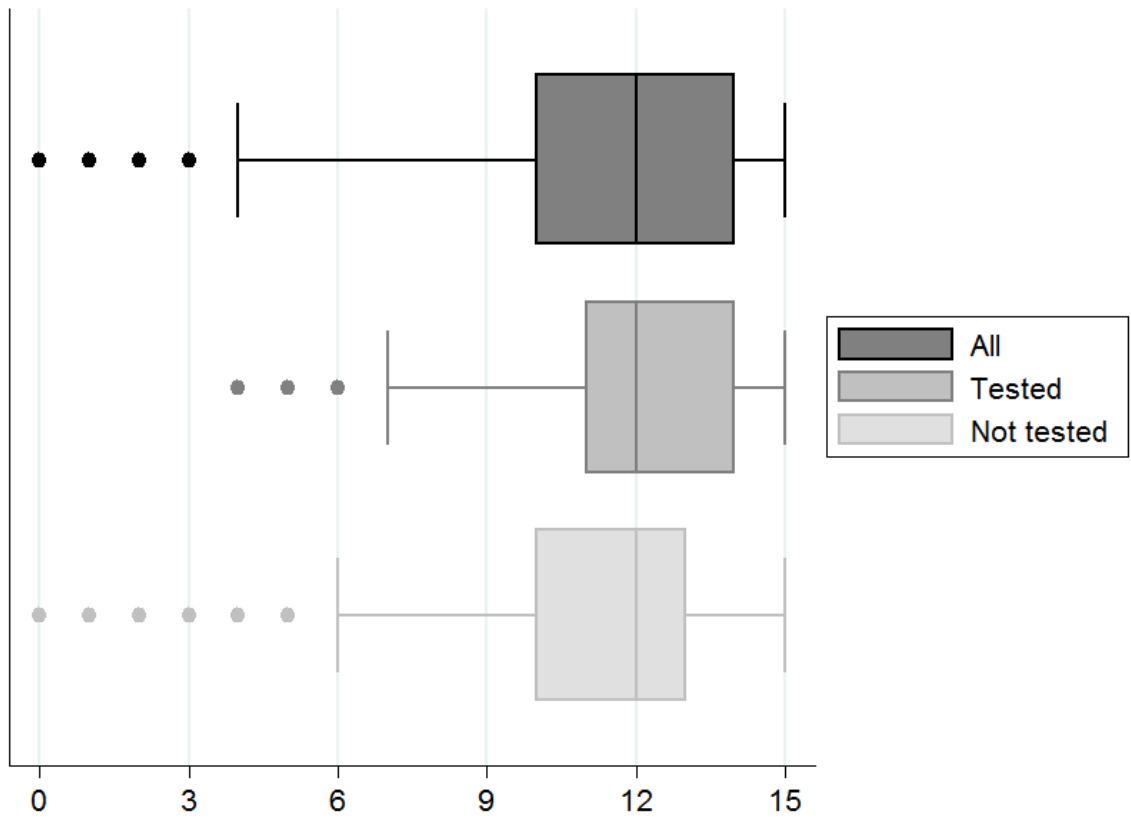

Supplement: 41431_2018_325_MOESM6_ESM.pdf [file 41431_2018_325_MOESM6_ESM.pdf]
