# Supplementary material for: Australians’ views and experience of personal genomic testing: survey findings from the Genioz study
Source: PubMed Central journal article supplement (PMC6461785; doi:10.1038/s41431-018-0325-x), 2019-01-21
Supplement: 41431_2018_325_MOESM7_ESM.pdf [file 41431_2018_325_MOESM7_ESM.pdf]

Supplementary Figure 6: Reported ways testing was arranged (n=571)<sup>a,b</sup>

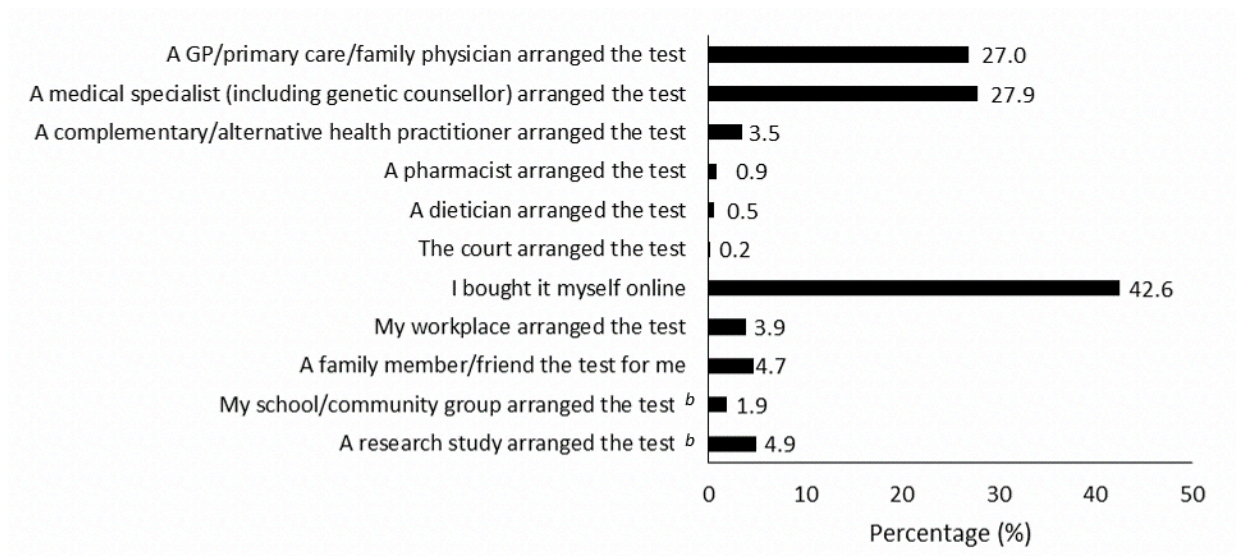

<sup>a</sup> – While there was n=571 completed records for this question, respondents with experience of more than one test type could select the different ways in which they accessed testing

<sup>b</sup> – The order of options are as they appeared in the survey. These test types are new categories developed during analysis, based on open-ended responses
